# Supplementary material
Source: PubMed Central journal article supplement (PMC5609701)
Supplement: NIHMS850768-supplement-Suppl_.pdf [file NIHMS850768-supplement-Suppl_.pdf]

Electronic Supplementary Information (ESI)

## Crosslinking of DNA-linked ligands to target proteins for enrichment from DNA-encoded libraries

Kyle E. Denton and Casey J. Krusemark

*Department of Medicinal Chemistry and Molecular Pharmacology, College of Pharmacy, Purdue University and Purdue University Center for Cancer Research, 575 Stadium Mall Dr., West Lafayette, IN, USA 47906.  
E-mail: cjk@purdue.edu*

### Table of Contents

|                                                       |         |
|-------------------------------------------------------|---------|
| OctetRed384 data for DNA-ligand binding to CAII ..... | 2 – 5   |
| OctetRed384 data for DNA-GL-CBS binding to BSA .....  | 5       |
| Crosslinking of CBX8 .....                            | 6       |
| Crosslinking of PKA .....                             | 7       |
| Oligonucleotide sequences and modifications .....     | 8       |
| Synthesis of ligands on DNA .....                     | 8 – 11  |
| Synthesis of reactive groups.....                     | 11 – 12 |
| Synthesis of reactive group on DNA .....              | 12 – 13 |
| References.....                                       | 13      |

## OctetRed384 data for DNA-ligand binding to CAII

General procedure for determining on-DNA  $K_d$ 's:

SAX biosensors were pre-incubated in buffer (PBST (0.1 M sodium phosphate, pH 7.4, 0.15 M NaCl, 0.02% tween-20)) for 10 minutes. A reference well (no target protein) was used in all experiments and were performed at 30 °C

Baseline 1: (buffer) 60 s

Loading 1: (1  $\mu$ M ssDNA'-5'-biotin in buffer) approx. 30 s or until 80 - 90 % signal saturation

Baseline 2: (buffer) 60 s

Loading 2: (0.5-5  $\mu$ M 5'-ligand-ssDNA in buffer) approx. 120 s or until signal stabilizes

Baseline 3: (buffer) 60 s

Association: (varying CAII concentrations) 300 s or until signal stabilized

Dissociation: (buffer) 300 s or until signal returns or baseline or > 10 % decreased

Example raw data output:

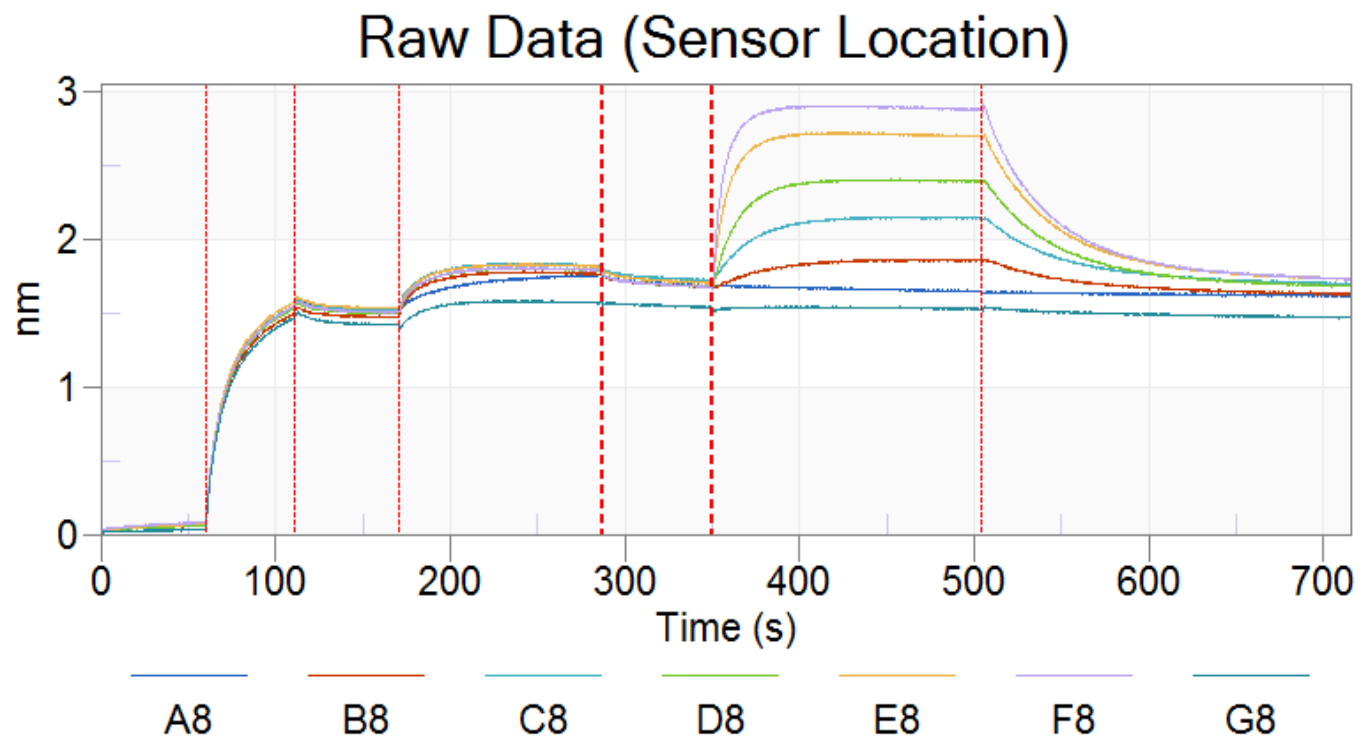

Biosensor A8: no CAII

Biosensor B8, C8, D8, E8, F8: increasing concentrations of CAII

Biosensor G8: non-ligand DNA in 20  $\mu$ M CAII

## GL-CBS-ssDNA to CAII

Local fitting

| Conc. (nM) | KD (M)   | KD Error | kon(1/Ms) | kon Error | kdis(1/s) | kdis Error | Full X <sup>2</sup> | Full R <sup>2</sup> |
|------------|----------|----------|-----------|-----------|-----------|------------|---------------------|---------------------|
| 62.5       | 4.91E-06 | 1.13E-05 | 1.05E+03  | 2.41E+03  | 5.14E-03  | 3.99E-05   | 0.2643              | 0.983               |
| 125        | 8.86E-08 | 7.42E-10 | 4.66E+04  | 3.80E+02  | 4.13E-03  | 7.97E-06   | 0.059               | 0.9986              |
| 250        | 1.23E-07 | 6.79E-10 | 3.70E+04  | 1.96E+02  | 4.54E-03  | 7.13E-06   | 0.0662              | 0.9992              |
| 500        | 9.51E-08 | 7.00E-10 | 4.03E+04  | 2.80E+02  | 3.83E-03  | 9.40E-06   | 0.3311              | 0.9977              |
| 1000       | 1.48E-07 | 7.69E-10 | 3.01E+04  | 1.49E+02  | 4.45E-03  | 7.23E-06   | 0.1667              | 0.9991              |

Global fitting

| KD (M)   | KD Error | kon(1/Ms) | kon Error | kdis(1/s) | kdis Error | Full X <sup>2</sup> | Full R <sup>2</sup> |
|----------|----------|-----------|-----------|-----------|------------|---------------------|---------------------|
| 1.21E-07 | 6.89E-10 | 3.53E+04  | 1.92E+02  | 4.26E-03  | 7.15E-06   | 2.4115              | 0.9965              |

**Table 1** GL-CBS-ssDNA to CAII

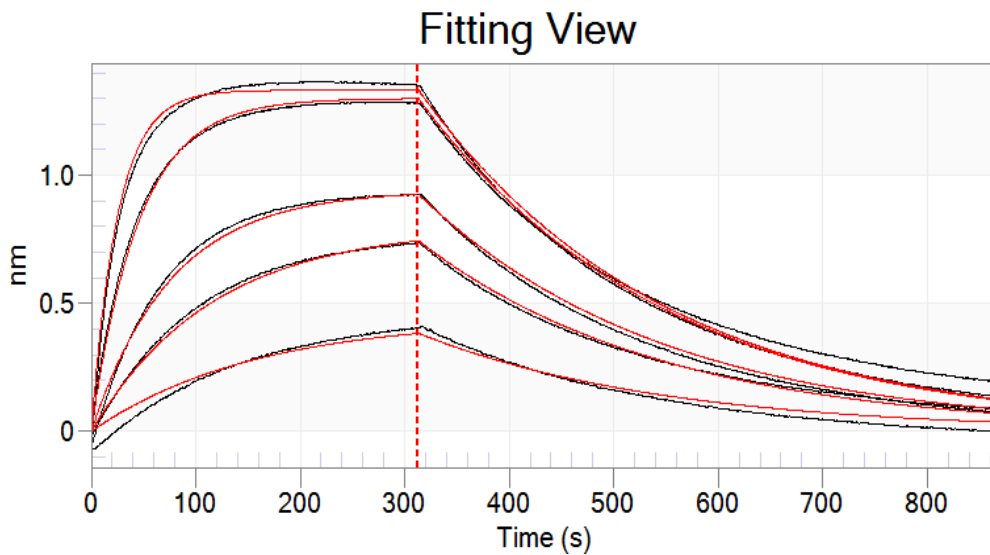

**Figure S1** Binding curves with curve fits (red) of GL-CBS-ssDNA binding to CAII with reference well subtraction

## CBS-ssDNA to CAII

Local fitting

| Conc. (nM) | KD (M)   | KD Error | kon(1/Ms) | kon Error | kdis(1/s) | kdis Error | Full X <sup>2</sup> | Full R <sup>2</sup> |
|------------|----------|----------|-----------|-----------|-----------|------------|---------------------|---------------------|
| 259        | 2.10E-05 | 4.71E-05 | 8.10E+02  | 1.82E+03  | 1.75E-04  | 3.99E-05   | 0.0234              | 0.9911              |
| 778        | 9.72E-07 | 1.57E-08 | 1.49E+04  | 2.36E+02  | 4.62E-05  | 7.97E-06   | 0.0144              | 0.9989              |
| 2330       | 1.03E-06 | 1.43E-08 | 1.31E+04  | 1.73E+02  | 5.80E-05  | 7.13E-06   | 0.0746              | 0.998               |
| 7000       | 1.25E-06 | 2.21E-08 | 1.02E+04  | 1.71E+02  | 7.01E-05  | 9.40E-06   | 0.2717              | 0.9966              |
| 2.10E+04   | 2.45E-06 | 3.69E-08 | 5.89E+03  | 8.52E+01  | 6.11E-05  | 7.23E-06   | 0.1897              | 0.9983              |

Global fitting

| KD (M)   | KD Error | kon(1/Ms) | kon Error | kdis(1/s) | kdis Error | Full X <sup>2</sup> | Full R <sup>2</sup> |
|----------|----------|-----------|-----------|-----------|------------|---------------------|---------------------|
| 1.57E-06 | 1.81E-08 | 8.89E+03  | 9.88E+01  | 1.40E-02  | 4.36E-05   | 1.3159              | 0.9963              |

Table 2 CBS-ssDNA to CAII

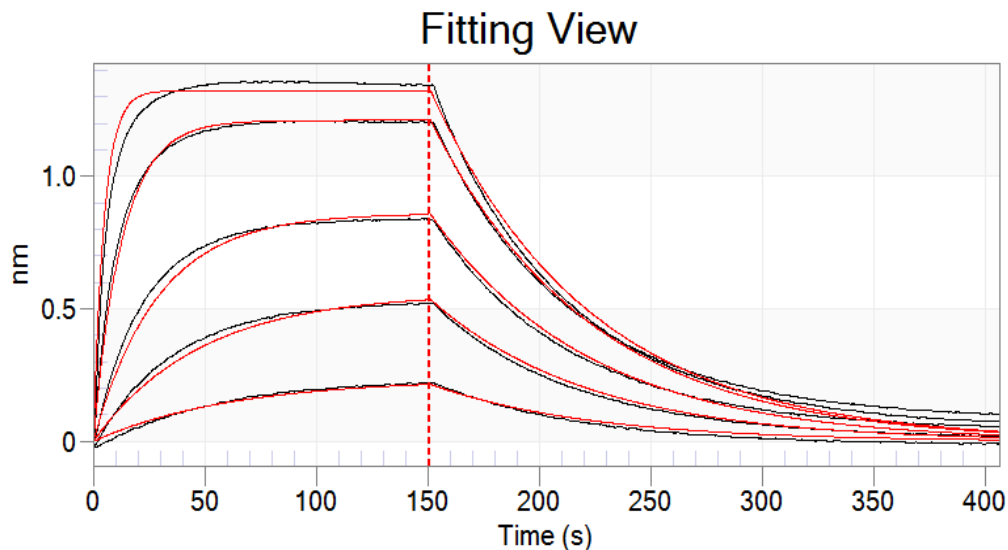

Figure S2 Binding curves with curve fits (red) of CBS-ssDNA binding to CAII with reference well subtraction

### D-CBS-ssDNA to CAII

Local fitting

| Conc. (nM) | KD (M)   | KD Error | kon(1/Ms) | kon Error | kdis(1/s) | kdis Error | Full X <sup>2</sup> | Full R <sup>2</sup> |
|------------|----------|----------|-----------|-----------|-----------|------------|---------------------|---------------------|
| 740        | 1.28E-06 | 4.36E-08 | 1.36E+04  | 4.56E+02  | 1.74E-02  | 1.03E-04   | 0.0072              | 0.9968              |
| 2220       | 8.08E-07 | 3.17E-08 | 1.63E+04  | 6.04E+02  | 1.31E-02  | 1.69E-04   | 0.2075              | 0.9798              |
| 6670       | 2.55E-06 | 6.98E-08 | 7.04E+03  | 1.82E+02  | 1.79E-02  | 1.60E-04   | 0.1975              | 0.9934              |
| 2.00E+04   | 3.87E-06 | 1.38E-07 | 4.49E+03  | 1.52E+02  | 1.74E-02  | 1.94E-04   | 0.6404              | 0.9893              |
| 6.00E+04   | 9.53E-06 | 3.51E-07 | 1.99E+03  | 7.01E+01  | 1.90E-02  | 2.12E-04   | 0.8141              | 0.9906              |

Global fitting

| KD (M)   | KD Error | kon(1/Ms) | kon Error | kdis(1/s) | kdis Error | Full X <sup>2</sup> | Full R <sup>2</sup> |
|----------|----------|-----------|-----------|-----------|------------|---------------------|---------------------|
| 4.67E-06 | 1.10E-07 | 3.90E+03  | 8.84E+01  | 1.82E-02  | 1.17E-04   | 3.3632              | 0.9876              |

Table 3 D-CBS-ssDNA to CAII

### Fitting View

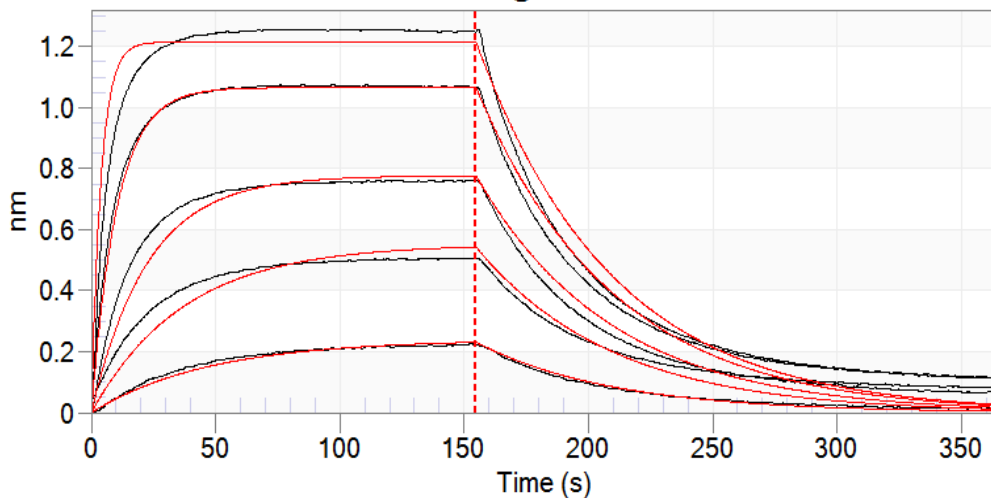

Figure S3 Binding curves with curve fits (red) of D-CBS-ssDNA binding to CAII with reference well subtraction

### OctetRed384 data for DNA-GL-CBS binding to BSA

Raw Data (Sensor Location)

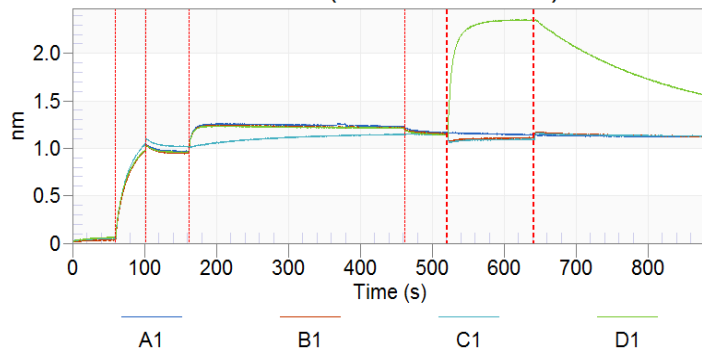

Align X

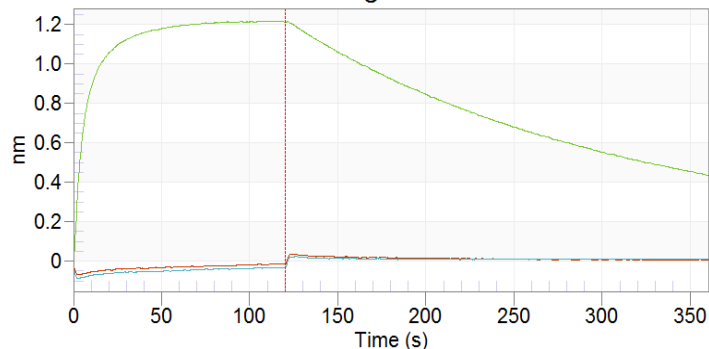

Biosensor A1: GL-CBS-ssDNA with no protein (reference well)

Biosensor B1: GL-CBS-ssDNA with 10  $\mu$ M BSA

Biosensor C1: Bz-ssDNA with 10  $\mu$ M BSA

Biosensor D1: GL-CBS-ssDNA with 10  $\mu$ M CAII

Figure S4 Binding curves of D-CBS-ssDNA binding to BSA or CAII with reference well subtraction

## Crosslinking of CBX8

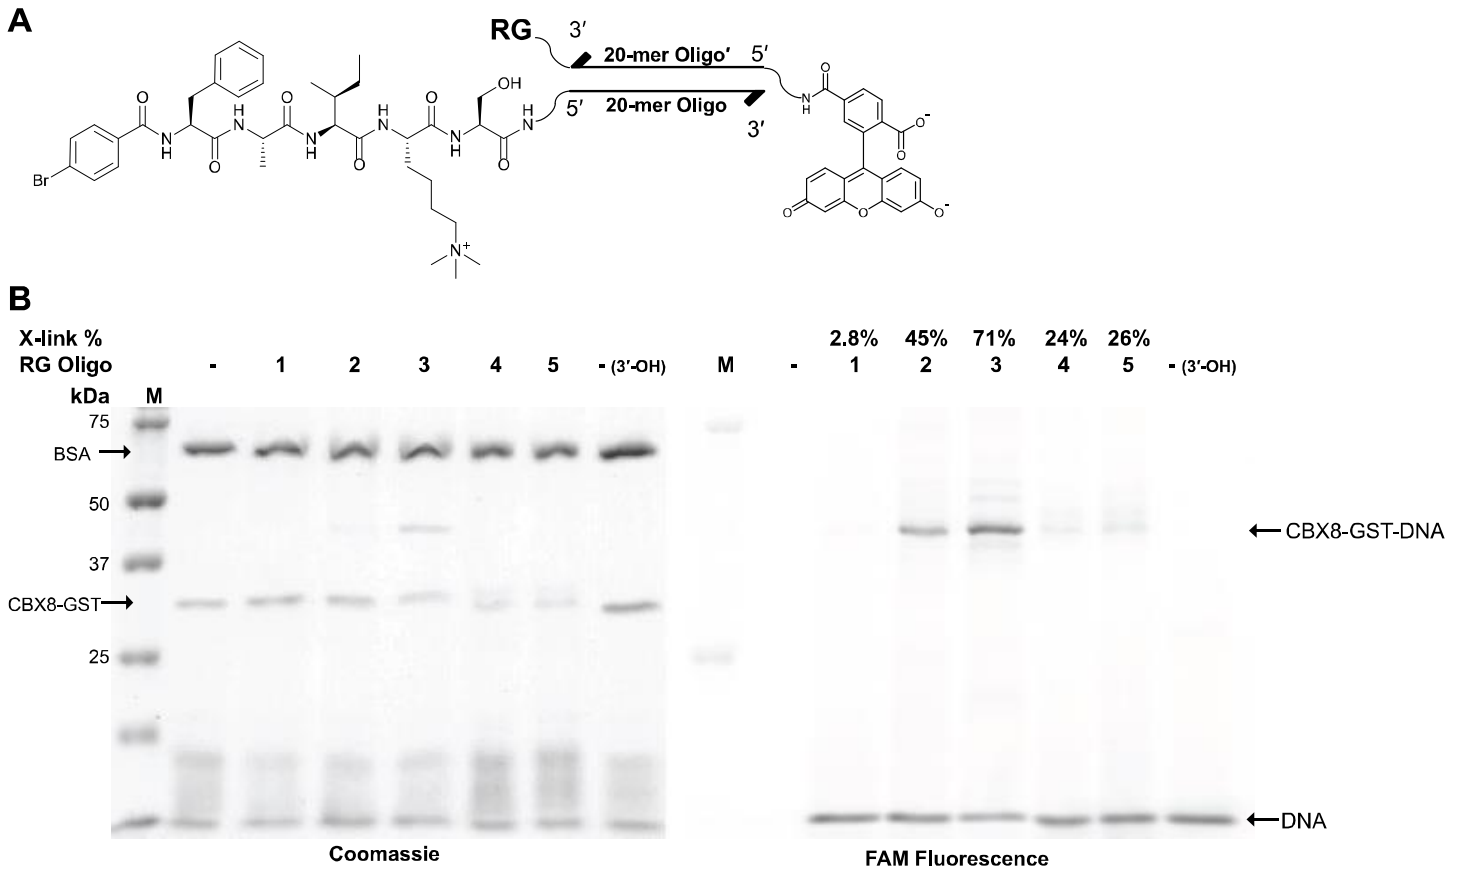

**Figure S5** Ligand-directed crosslinking of DNA to CBX8-GST with various reactive groups. (A) Structure of CBX peptide ligand-ssDNA. (B) Reactive group labels as given in main text Fig. 1 (tosyl **1**, NHS ester **2**, sulfonyl fluoride **3**, phenyl azide **4**, diazirine **5**). A non-reactive group-containing oligo (ssDNA'-5'-FAM) (5'-OH ssDNA') was used as a non-reactive control in addition to the non-ligand (5'-OH ssDNA) control (-). Buffer: 20 mM HEPES, pH 7.4, 0.25 M NaCl, 0.02% (v/v) tween-20, 1.0 mg/mL tRNAs with 1.0  $\mu$ M CBX8-GST, 1.0 M BSA, 1.0  $\mu$ M ligand-ssDNA, 0.75  $\mu$ M RG-ssDNA'.

## Crosslinking of PKA

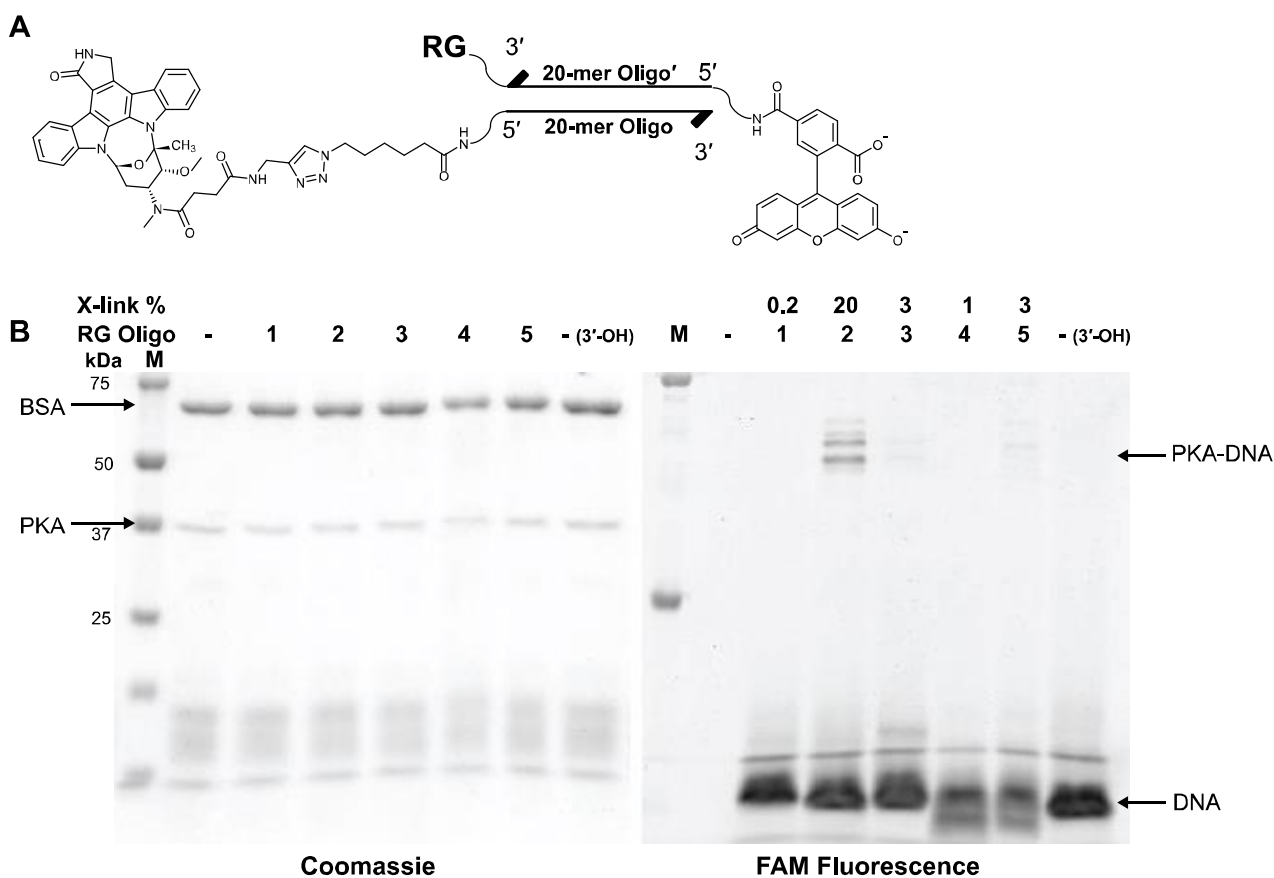

**Figure S6** Ligand-directed crosslinking of DNA to PKA (catalytic subunit) with various reactive groups. (A) Structure of STS-ssDNA. (B) Reactive group labels as given in main text Fig. 1 (tosyl **1**, NHS ester **2**, sulfonyl fluoride **3**, phenyl azide **4**, diazirine **5**). A non-reactive group-containing oligo (ssDNA'-5'-FAM) (5'-OH ssDNA') was used as a non-reactive control in addition to the non-ligand (5'-OH ssDNA) control (-). Buffer: 20 mM HEPES, pH 7.4, 0.25 M NaCl, 10 mM MgCl<sub>2</sub>, 0.02% (v/v) tween-20, 1.0 mg/mL tRNAs with 1.0 μM CBX8-GST, 1.0 μM BSA, 1.0 μM ligand-ssDNA, 0.75 μM RG-ssDNA'.

## Oligonucleotide sequences and modifications

|                                       |                                                         |
|---------------------------------------|---------------------------------------------------------|
| ssDNA-5'-C12-NH <sub>2</sub>          | /5AmMC12/ATGGTATCAAGCTTGCCACA                           |
| ssDNA-5'-PEG-NH <sub>2</sub>          | /5AmMC6/5Sp18/ATGGTATCAAGCTTGCCACA                      |
| ssDNA'-3'-NH <sub>2</sub>             | TGTGGCAAGCTTGATACCAT/3AmMO/                             |
| ssDNA'-3'-NH <sub>2</sub> -5'-FAM     | /56-FAM/TGTGGCAAGCTTGATACCAT/3AmMO/                     |
| ssDNA-linker-ssDNA-5'-NH <sub>2</sub> | /5AmMC12/ATGGTATCAAGCTTGCCACA/iSp9/GTCGAGCTCTCTACTGCATA |
| ssDNA'-5'-FAM                         | /56-FAM/TGTGGCAAGCTTGATACCAT                            |
| ssDNA'-5'-Biotin                      | /5Biosg/TGTGGCAAGCTTGATACCAT                            |

Abbreviations for modifications within sequences are given as used by Integrated DNA Technologies (IDT).

## Synthesis of ligands on DNA

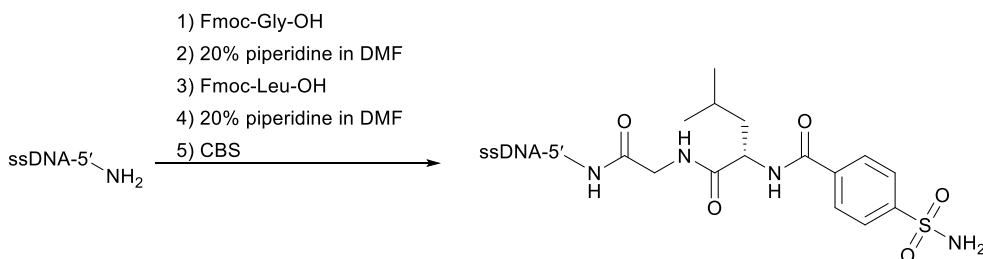

GLCBS-ssDNA was prepared by a modified acylation conditions described in the main text<sup>1</sup>. Briefly, the 5'-amine modified ssDNA was immobilized on DEAE sepharose in a solid phase synthesis cartridge with DEAE bind buffer and then equilibrated in MeOH. The acylation reaction mixture (50 mM Fmoc-Gly-OH, 50 mM EDC-HCl, 5 mM HOAt in 40:60 DMF:MeOH) was incubated for 30 minutes. The reaction mixture was then eluted and a fresh acylation reaction mixture was prepared and incubated again for 30 minutes at RT. The reaction mixture was eluted and the resin was washed with MeOH and then DMF. Deprotection of the Fmoc protecting group was completed by incubating the cartridge in 20 % piperidine in DMF for 30 minutes at RT. The deprotection mixture was eluted and the resin washed with DMF and then MeOH. Fmoc-L-Leu-OH was then coupled and deprotected using the sample procedure. The resulting dipeptide-ssDNA conjugate was capped with 4-carboxybenzenesulfonamide (CBS) by preparing a mixture of 50 mM CBS, 50 mM EDC-HCl, 5 mM HOAt in MeOH and incubating the cartridge for 30 minutes at RT. The acylation was repeated, and then the resin was washed with MeOH and DEAE bind buffer. The modified oligo was eluted by passing 1 mL of DEAE elution buffer through the cartridge. The resulting mixture was directly purified by HPLC. ESI: (M-11H)<sup>11-</sup> 609.7 (calcd. 609.7), (M-10H)<sup>10-</sup> 607.7 (calcd. 670.8), (M-9H)<sup>9-</sup> 745.4 (calcd. 745.4), (M-8H)<sup>8-</sup> 838.8 (calcd. 838.7), (M-7H)<sup>7-</sup> 958.7 (calcd. 958.7), (M-6H)<sup>6-</sup> 1118.8 (calcd. 1118.6).



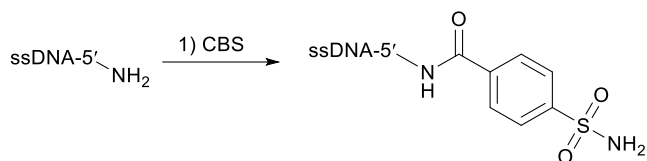

CBS-ssDNA was prepared using a similar procedure as GL-CBS-ssDNA. A double coupling using CBS was completed on ssDNA-5'-PEG-NH<sub>2</sub> and the resulting conjugate was eluted and directly purified by HPLC. MALDI: (M-H)<sup>-</sup> 6807.7 (calcd. 6807.0).

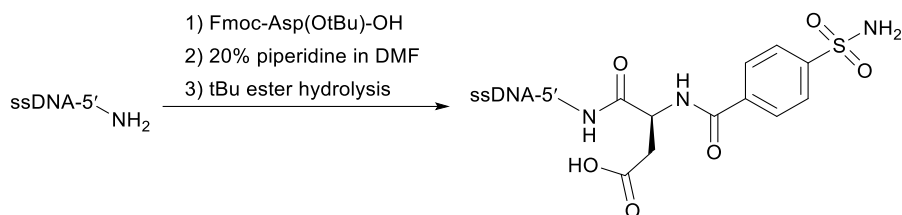

D-CBS-ssDNA was prepared using a similar procedure as CBS-ssDNA. To ssDNA-5'-PEG-NH<sub>2</sub>, a double coupling was completed using Fmoc-Asp(OtBu)-OH, followed by Fmoc deprotection and capping with CBS. The resulting conjugate was eluted in tBu ester DEAE elution buffer (1.5 M NaCl, 0.2 M MgCl<sub>2</sub>, 100 mM TEAA, pH 5.5, 0.005 % Triton X-100). The elution mixture was heated at 65 °C for 24 h and then directly HPLC purified. MALDI: (M-H)<sup>-</sup> 6923.7 (calcd. 6921.8).

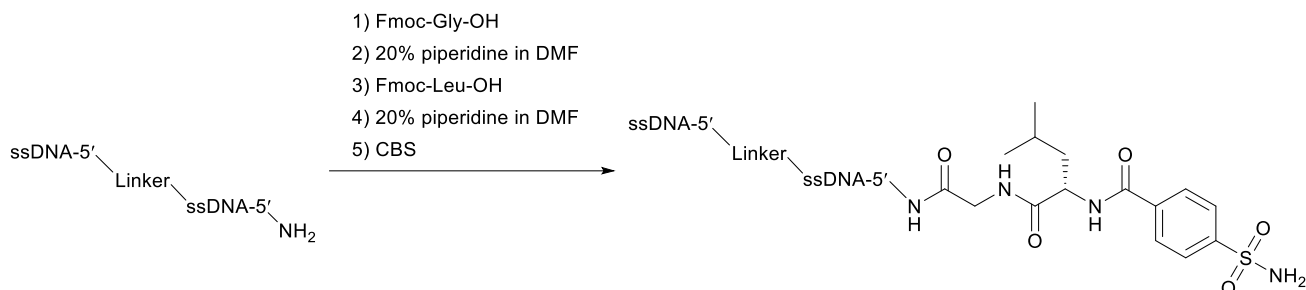

GL-CBS-ssDNA-linker-ssDNA was prepared using a similar procedure as GLCBS-ssDNA, except using ssDNA-linker-ssDNA-5'-NH<sub>2</sub> as the amine-modified oligo. The eluted oligo was directly HPLC purified. MALDI: (M-H)<sup>-</sup> 13,188.63 (calcd. 13,191.1), (M-2H)<sup>2-</sup> 6596.76 (calcd. 6595.1).

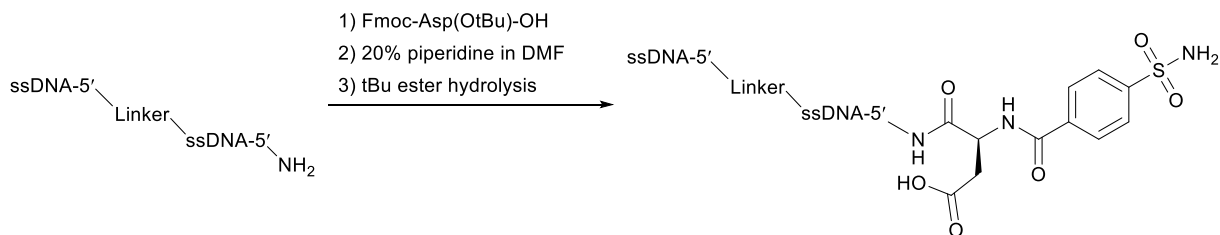

D-CBS-ssDNA-linker-ssDNA was prepared using a similar procedure as D-CBS-ssDNA, except using ssDNA-linker-ssDNA-5'-NH<sub>2</sub> as the starting oligo. The eluted oligo was directly HPLC purified. MALDI: (M+Na-2H)<sup>-</sup> 13,158.3 (calcd. 13,157.9).

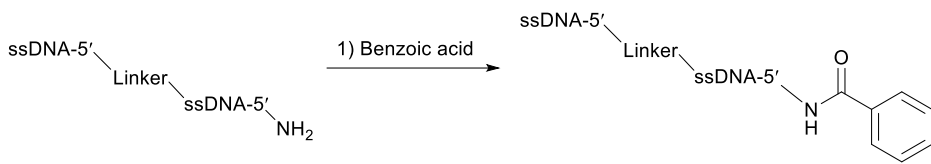

Bz-ssDNA-linker-ssDNA was prepared using a similar procedure as D-CBS-ssDNA-linker-ssDNA. To ssDNA-linker-ssDNA-5'-NH<sub>2</sub>, a double coupling with benzoic acid was completed and the resulting conjugate was eluted and directly purified by HPLC. MALDI: (M+H)<sup>+</sup> 12,948.6 (calcd. 12,941.7).

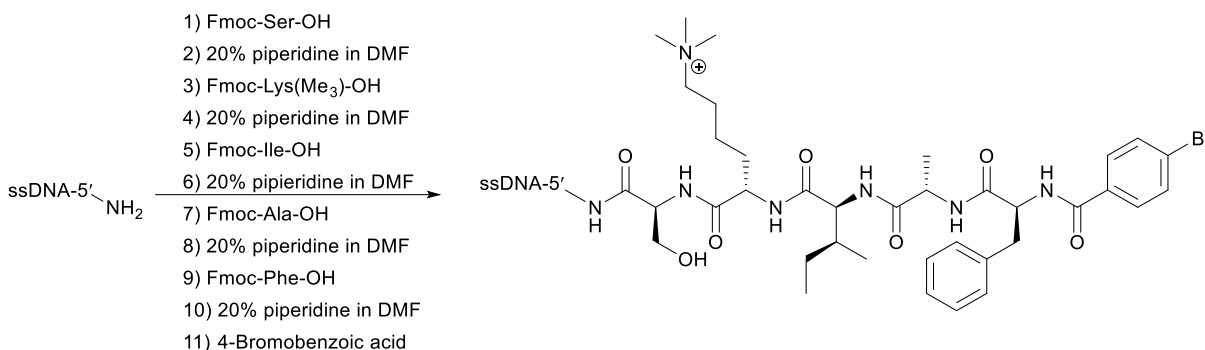

CBX peptide ligand-ssDNA (ssDNA-5'-PEG-SK(me<sub>3</sub>)IAF-4BrBa) was prepared using a modified procedure as ssDNA-5'-GL-CBS. All amino acids were double coupled, for 30 minutes at RT each coupling, using 50 mM Fmoc-AA (Fmoc-L-Ser(OH)-OH, Fmoc-L-Lys(Me<sub>3</sub>)-OH, Fmoc-L-Ile-OH, Fmoc-L-Ala-OH, Fmoc-L-Phe-OH), 50 mM EDC-HCl, and 5 mM HOAt in 40:60 DMF:MeOH, with the exception of Fmoc-L-Ile-OH which was completed using 50 mM EDC-HCl, and 50 mM HOAt in 40:60 DMF:MeOH and was triple coupled. Fmoc deprotections were completed in 40% piperidine in DMF, 30 minutes at RT. The peptide was capped with 4-bromobenzoic acid (4BrBA) using 50 mM 4BrBa, 50 mM EDC-HCl, 5 mM HOAt in MeOH, for 30 minutes at RT and repeated. The resulting DNA-peptide conjugate was eluted and directly HPLC purified. ESI: (M-12H)<sup>11-</sup> 671.5 (calcd. 671.4), (M-11H)<sup>10-</sup> 738.7 (calcd. 738.6), (M-10H)<sup>9-</sup> 820.9 (calcd. 820.8), (M-9H)<sup>8-</sup> 923.6 (calcd. 923.5), (M-8H)<sup>7-</sup> 1055.6 (calcd. 1055.6), (M-5H)<sup>6-</sup> 1231.6 (calcd. 1231.7).

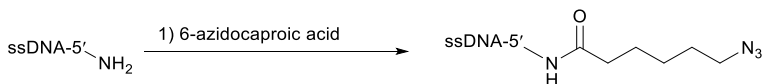

ssDNA-5'-CapN3 was prepared using the same procedure as ssDNA-5'-D-CBS. Briefly, a double coupling using 6-azidohexanoic acid was completed and the resulting conjugate was eluted and directly HPLC purified. MALDI: (M-H)<sup>-</sup> 6764.3 (calcd. 6763.7).

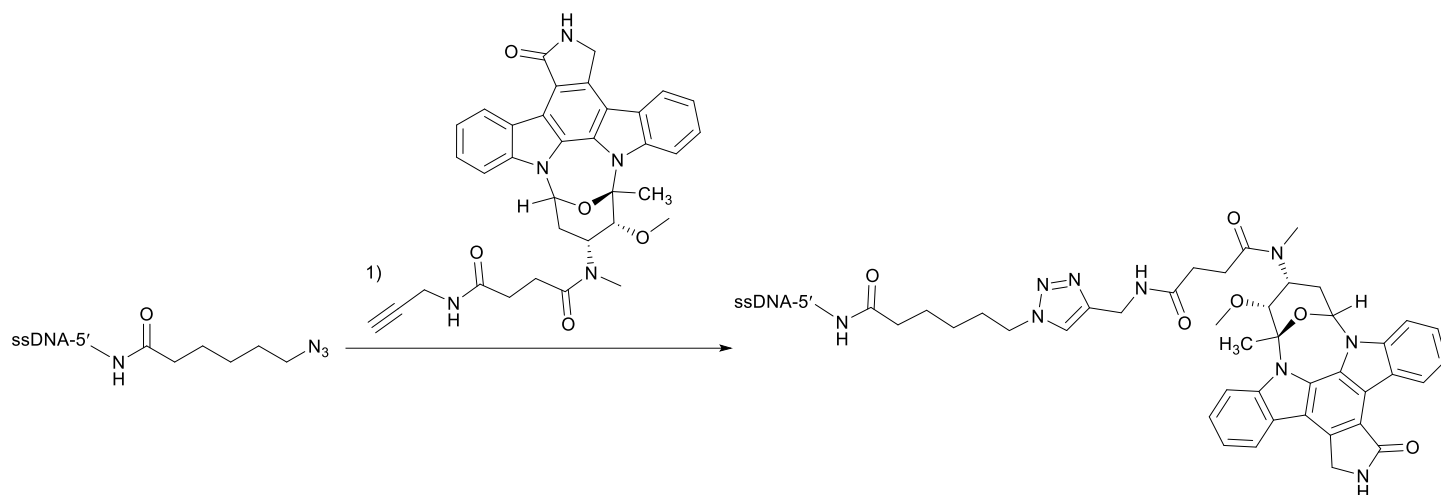

STS-ssDNA (ssDNA-5'-PEG-Cap-STS) was prepared as follows: the alkyne staurosporine derivative was prepared as previously reported<sup>2</sup>. The crude product was used directly for conjugation to ssDNA-5'-CapN3 via CuAAC3. Briefly, 1 nmol of ssDNA-5'-CapN3 was suspended in 1.0  $\mu\text{L}$  2M TEAA, pH 6.5, 10.0  $\mu\text{L}$  of crude alkyne staurosporine in DMSO (approx. 100 eq.), 4.0  $\mu\text{L}$  50 mM THPTA. To this, 2.0  $\mu\text{L}$  of a fresh solution of sat. CuBr in DMSO (approx 1 mg/1 mL) was added, mixed thoroughly, and incubated at RT for 3 h. 10 L of 0.5 M EDTA, pH 8.0 was added and directly HPLC purified. MALDI: (M+Na-2H)- 7353.4 (calcd. 7353.3).

### Synthesis of reactive groups

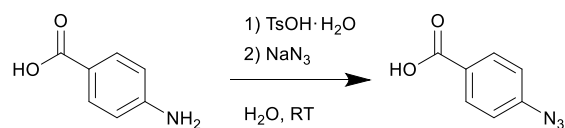

4-Azidobenzoic acid was prepared as previously described<sup>4</sup>. To 9 mL H<sub>2</sub>O, 1.62 g (8.52 mmol, 8.52 eq.) *p*-toluenesulfonic acid monohydrate and 0.137 g (1.00 mmol, 1.00 eq.) 4-aminobenzoic acid and was added and stirred until dissolved. Then, 0.621 g (9.00 mmol, 9.00 eq.) sodium nitrite was added slowly over 5 minutes. The mixture was stirred at RT for 30 minutes, followed by the slow addition of 0.104 g (1.60 mmol, 1.60 eq.) resulting in an immediate release of N<sub>2</sub> and formation of a white ppt. The mixture was stirred for an additional 30 minutes then filtered, washed with water and dried, yielding 0.088 g (54 %) of white solid. <sup>1</sup>H-NMR (300 MHz, DMSO-*d*<sub>6</sub>)  $\delta$  7.96 (d, *J* = 8.7 Hz, 2 H), 7.22 (d, *J* = 8.4 Hz, 2 H); CI-MS-CPI: (M+H) 164.20 (calcd. 164.05), (M-N<sub>2</sub>+H) 136.20 (calcd. 136.04).

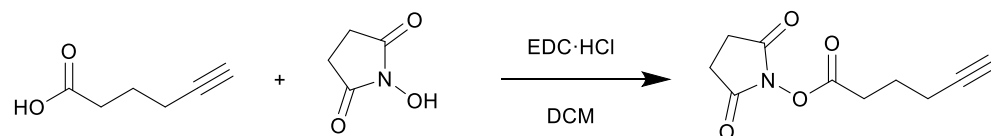

NHS 5-hexynoate was prepared as previously described<sup>5</sup>. To 200 mL DCM, 0.500 g (4.46 mmol, 1.00 eq.) 5-hexynoic acid was stirred with 0.538 g (4.68 mmol, 1.05 eq.) *N*-hydroxysuccinimide with 0.897 g (4.68 mmol, 1.05 eq.) EDC-HCl at RT for 7 hours. The reaction mixture was diluted and washed with H<sub>2</sub>O, NaHCO<sub>3</sub> (aq), and sat. NaCl, then dried over MgSO<sub>4</sub> and concentrated to give 0.74 g (80 %) pale yellow oil. <sup>1</sup>H-NMR (300 MHz, CDCl<sub>3</sub>)  $\delta$  2.83 (s, 4H), 2.77 (t, *J* = 7.5 Hz, 2H), 2.34 (dt, *J* = 2.7, 6.9 Hz, 2H), 2.012 (t, *J* = 2.7 Hz, 1H), 1.96 (quint, *J* = 7.2 Hz, 2H); <sup>13</sup>C NMR (75 MHz, CDCl<sub>3</sub>)  $\delta$  17.5, 23.3, 25.5, 29.6, 69.8, 82.0, 168.1, 169.0.

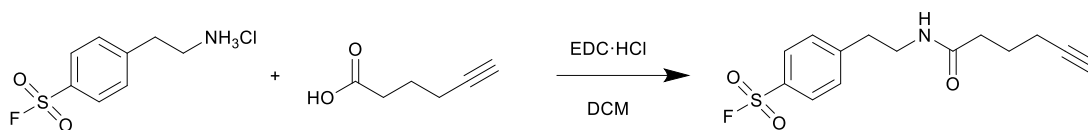

4-[2-(hex-5-ynoylamino)ethyl]benzenesulfonyl fluoride was prepared as follows: in 10 mL DCM, 0.460 g (2.40 mmol, 1.2 eq.) EDC-HCl and 700  $\mu$ L (5.0 mmol, 2.5 eq.) DIEA was added with 110  $\mu$ L (2.00 mmol, 1.0 eq.) 5-hexynoic acid and stirred for 5 minutes at 0 °C under Ar. To this, 0.575 g (2.4 mmol, 1.2 eq.) 4-aminomethylbenzenesulfonyl fluoride-HCl was added portionwise while stirring at 0 °C. The mixture was allowed to slowly warm to RT over 6 h. The reaction was then diluted with 100 mL DCM and washed 2x 100 mL half-saturated NaHCO<sub>3</sub> (aq), 3x 100 mL 0.1M HCl (aq), sat. NaCl (aq), and then dried over MgSO<sub>4</sub> and concentrated *in vacuo* to give 0.384 g of white solid (69 %). <sup>1</sup>H-NMR (300 MHz, CDCl<sub>3</sub>)  $\delta$  7.95 (d, *J* = 8.4 Hz, 2H), 7.46 (d, *J* = 8.1 Hz, 2H), 5.58 (br s, 1H), 3.56 (q, *J* = 6.3 Hz, 2 H), 2.97 (t, *J* = 6.9 Hz, 2 H), 2.23 (t, *J* = 7.2 Hz, 2H), 2.22 (dt, *J* = 2.7, 6.9 Hz, 2 H), 1.96 (t, *J* = 2.7 Hz, 1 H), 1.83 (quint, *J* = 6.9 Hz, 2H); <sup>13</sup>C NMR (75 MHz, CDCl<sub>3</sub>)  $\delta$  172.5, 148.0, 131.2, 130.2, 128.9, 83.4, 69.4, 40.2, 36.0, 34.6, 24.1, 17.8; CI-MS: (M+H)<sup>+</sup> 298.35 (calcd. 298.35), (M-HF)<sup>+</sup> 278.35 (calcd. 278.35).

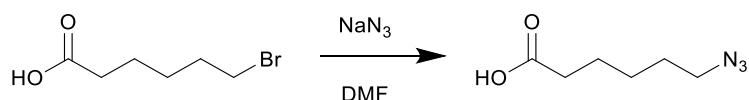

6-Azidocaproic acid was prepared as previously described<sup>6</sup>. To 5 mL of DMF, 0.782 g (4.00 mmol, 1.0 eq.) 6-bromohexanoic acid was stirred with 0.520 g (8.00 mmol, 2.0 eq.) NaN<sub>3</sub> for 12 h at 85 °C. The reaction was cooled to RT then diluted with water and extracted with DCM. The combined organic phases were washed with 0.1 M HCl (aq), brine, and then dried over MgSO<sub>4</sub>, and concentrated *in vacuo* to give 0.525 g (83 %) of yellow oil. <sup>1</sup>H-NMR (300 MHz, CDCl<sub>3</sub>)  $\delta$  3.28 (t, *J* = 6.6 Hz, 2H), 2.32 (t, *J* = 7.2 Hz, 2H), 1.62 (m, 4H), 1.42 (m, 2H).

### Synthesis of reactive groups on DNA

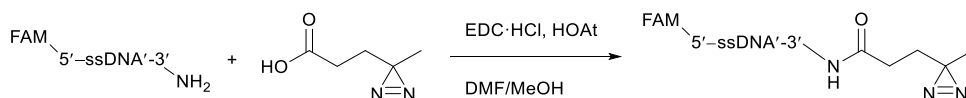

3'-Diazirine-5'-FAM-ssDNA' (**5**) was prepared from ssDNA'-3'-NH<sub>2</sub>-5'-FAM-ssDNA using 50 mM 3-Methyl-diazirine-3-propanoic acid, 50 mM EDC-HCl, 5 mM HOAt in 40:60 DMF:MeOH, 30 minutes at RT with double coupling. The conjugate was eluted in Alkali DEAE Elution Buffer (0.1 M Tris, pH 8.0, 1.5 M NaCl, 0.005 % Triton X-100) and directly purified by HPLC. MALDI: (M-H)<sup>-</sup> 7014.1 (calcd. 6,9893.7), (M-2H)<sup>2-</sup> 3498.9 (calcd. 3494.4). \*Alkali conditions were used to reverse acylation of FAM prior to HPLC purification

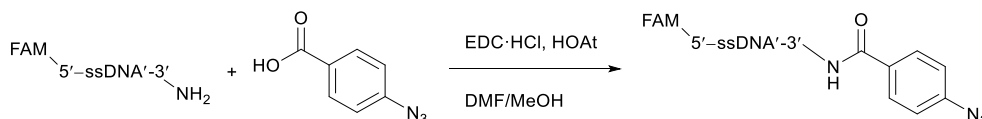

3'-Phenyl azide-5'-FAM-ssDNA' (**4**) was prepared from ssDNA'-3'-NH<sub>2</sub>-5'-FAM-ssDNA using 4-Azidobenzoic acid was coupled onto ssDNA'-3'-NH<sub>2</sub>-5'-FAM using the same procedure as for **5**. MALDI: (M-H)<sup>-</sup> 6965.7 (calcd. 7025.7). \*MALDI laser (337 nm) can decompose PhN<sub>3</sub>

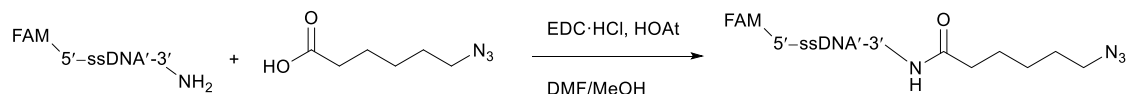

ssDNA'-3'-CapN<sub>3</sub>-5'-FAM was prepared by coupling 6-azidohexanoic acid to ssDNA'-3'-NH<sub>2</sub>-5'-FAM using the same procedure as for **5**. MALDI: (M-H)<sup>-</sup> 7020.83 (calcd. 7018.8). \*Diazotransfer conditions were attempted but were incompatible with the FAM moiety.

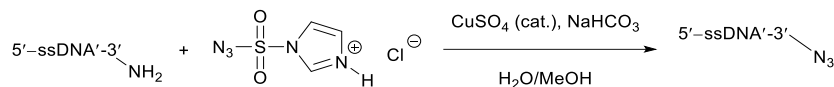

ssDNA'-3'-N<sub>3</sub> was prepared via diazotransfer of ssDNA'-3'-NH<sub>2</sub> was completed using the procedure described by Lartia et al.<sup>7</sup> Briefly, 20 nmol of ssDNA'-3'-N<sub>3</sub> was suspended in 65 μL 50 mM NaHCO<sub>3</sub> in 3:1 H<sub>2</sub>O:MeOH, with 1.2 μL 50 mM CuSO<sub>4</sub> and 3.6 μL fresh imidazole-1-sulfonyl azide-HCl<sup>8</sup> in 50% MeOH (aq) and heated at 60 C for 2 h. The reaction was quenched by adding 1.2 L 0.5 M EDTA, pH 8.0 and directly HPLC purified. ESI: (M-11H)<sup>11-</sup> 578.0 (calcd. 578.0), (M-10H)<sup>10-</sup> 635.9 (calcd. 635.9), (M-9H)<sup>9-</sup> 706.7 (calcd. 706.7), (M-8H)<sup>8-</sup> 795.1 (calcd. 795.2), (M-7H)<sup>7-</sup> 908.8 (calcd. 908.9), (M-6H)<sup>6-</sup> 1060.2 (calcd. 1060.5).

## References

- 1 D. R. Halpin, J. A. Lee, S. J. Wrenn and P. B. Harbury, *PLoS Biol.*, 2004, **2**, 1031-1038.
- 2 H. Shi, X. Cheng, S. K. Sze and S. Q. Yao, *Chem. Commun.*, 2011, **47**, 11306.
- 3 Jena Bioscience, *Copper(I) Catalyzed Click Reactions*, 2011, [http://www.jenabioscience.com/images/741d0cd7d0/Copper\\_Catalyzed\\_Click\\_Reactions.pdf](http://www.jenabioscience.com/images/741d0cd7d0/Copper_Catalyzed_Click_Reactions.pdf)
- 4 K. V. Kutonova, M. E. Trusova, P. Postnikov, V. D. Filimonov and J. Parello, *Synth.*, 2013, **45**, 2706–2710.
- 5 B. Jagadish, R. Sankaranarayanan, L. Xu, R. Richards, J. Vagner, V. J. Hruby, R. J. Gillies and E. A. Mash, *Bioorganic Med. Chem. Lett.*, 2007, **17**, 3310–3313.
- 6 C. Bin Yim, O. C. Boerman, M. De Visser, M. De Jong, A. C. Dechesne, D. T. S. Rijkers and R. M. J. Liskamp, *Bioconjug. Chem.*, 2009, **20**, 1323–1331.
- 7 R. Lartia, P. Murat, P. Dumy and E. Defrancq, *Org. Lett.*, 2011, **13**, 5672–5675.
- 8 E. D. Goddard-Borger and R. V. Stick, *Org. Lett.*, 2007, **9**, 3797–3800.
